# Supplementary material for: Multi-laboratory evaluation of the Illumina iSeq platform for whole genome sequencing of Salmonella, Escherichia coli and Listeria
Source: PubMed Central journal article supplement — Microb Genom. 2022 Feb 3;8(2):000717. doi: 10.1099/mgen.0.000717 (PMC8942033; doi:10.1099/mgen.0.000717), 2022-02-03
Supplement: mgen-8-0717-s001.pdf [file mgen-8-0717-s001.pdf]

## Supplemental Table 1

Mitchell et al. Multi-laboratory evaluation of the Illumina iSeq platform for whole genome sequencing of *Salmonella*, *Escherichia coli*, and *Listeria*

### Additional identifiers for isolates

| Organism                                       | V-CLASP ID/GenomeTrakr PT ID/NCBI Accession # | ST   | Run #               |
|------------------------------------------------|-----------------------------------------------|------|---------------------|
| <i>Salmonella enterica</i> ser. Albany         | V-CLASP-D-59                                  | 292  |                     |
| <i>Salmonella enterica</i> ser. Typhimurium    | V-CLASP-D-01                                  | 19   |                     |
| <i>Salmonella enterica</i> ser. Enteritidis    | V-CLASP-D-40                                  | 11   | 1 <sup>^</sup> & 4* |
| <i>Salmonella enterica</i> ser. I 4,[5],12:i:- | V-CLASP-C-02                                  | 19   |                     |
| <i>Salmonella enterica</i> ser. Albany         | V-CLASP-D-59                                  | 292  |                     |
| <i>Salmonella enterica</i> ser. Typhimurium    | V-CLASP-D-01                                  | 19   |                     |
| <i>Salmonella enterica</i> ser. Enteritidis    | V-CLASP-D-40                                  | 11   | 2 <sup>^</sup>      |
| <i>Salmonella enterica</i> ser. I 4,[5],12:i:- | V-CLASP-C-02                                  | 19   |                     |
| <i>Salmonella enterica</i> ser. Derby          | V-CLASP-D-18                                  | 40   |                     |
| <i>Salmonella enterica</i> ser. Derby          | V-CLASP-D-18                                  | 40   |                     |
| <i>Salmonella enterica</i> ser. Newport        | V-CLASP-D-12                                  | 5    | 3 <sup>^</sup>      |
| <i>Salmonella enterica</i> ser. Newport        | V-CLASP-D-12                                  | 5    |                     |
| <i>Salmonella enterica</i> ser. Dublin         | CP032396                                      | 10   |                     |
| <i>Salmonella enterica</i> ser. Dublin         | CP032393                                      | 10   |                     |
| <i>Salmonella enterica</i> ser. Dublin         | CP032390                                      | 10   | 5 <sup>^</sup>      |
| <i>Salmonella enterica</i> ser. Dublin         | CPO32387                                      | 10   |                     |
| <i>Escherichia coli</i> ser. O157:H7           | ECP19-198                                     | 11   |                     |
| <i>Escherichia coli</i> ser. O157:H7           | ECP19-598                                     | 11   | 1*                  |
| <i>Escherichia coli</i> ser. O157:H7           | ECP19-798                                     | 11   |                     |
| <i>Escherichia coli</i> ser. O157:H7           | ECP19-2498                                    | 11   |                     |
| <i>Listeria monocytogenes</i>                  | LMP18-H8393                                   | 3    |                     |
| <i>Listeria monocytogenes</i>                  | LMP18-H2446                                   | 7    |                     |
| <i>Escherichia coli</i> O9:H10                 | N17EC0320                                     | 540  |                     |
| <i>Escherichia coli</i> O89:H9                 | N17EC0326                                     | 10   |                     |
| <i>Escherichia coli</i> O83:H42                | N17ECO616                                     | 1485 | 2* & 3*             |
| <i>Escherichia coli</i> O117:H42               | N17EC1164                                     | 2207 |                     |
| <i>Listeria monocytogenes</i>                  | FDA00008248                                   | 554  |                     |
| <i>Listeria monocytogenes</i>                  | FDA00006667                                   | 6    |                     |

<sup>^</sup>: Nextera XT; \*: Nextera DNA Flex
